# Supplementary material for: Interaction of tripodal Schiff-base ligands with silver(i): structural and solution studies
Source: Royal Society of Chemistry journal article supplement (doi:10.1039/c0ce00255k), 2010-01-01
Supplement: c0ce00255k.pdf [file c0ce00255k.pdf]

## Interaction of tripodal Schiff-base ligands with silver(I): Structural and solution studies

Marco Wenzel,<sup>a,b</sup> Bianca Antonioli,<sup>b</sup> Kerstin Gloe,<sup>b</sup> Karsten Gloe,<sup>\*b</sup> Matthias Langer,<sup>b</sup> Hanns-Jürgen Buschmann,<sup>c</sup> Keisuke Otho,<sup>d</sup> Martin Schröder,<sup>e</sup> Alexander J. Blake,<sup>e</sup> Claire Wilson,<sup>e</sup> Allison M. Mills,<sup>b</sup> Leonard F. Lindoy<sup>f</sup> and Paul G. Plieger<sup>a</sup>

<sup>a</sup> Institute of Fundamental Sciences, Massey University, Private Bag 11 222, Palmerston North, New Zealand.

<sup>b</sup> Department of Chemistry, Technical University Dresden, 01062, Dresden, Germany.

<sup>c</sup> Deutsches Textilforschungszentrum Nord-West, 47798 Krefeld, Germany

<sup>d</sup> Department of Applied Chemistry, Saga University, Saga 840-8502, Japan

<sup>e</sup> School of Chemistry, The University of Nottingham, University Park, Nottingham, UK NG7 2RD.

<sup>f</sup> Centre for Heavy Metals Research, School of Chemistry, University of Sydney, NSW, 2006, Australia.

### Crystallography

#### [Ag(1)]ClO<sub>4</sub>

**Table S1.** Selected angles [°] of [Ag(1)]ClO<sub>4</sub>

| atom      | angle [°] | atom      | angle [°] |
|-----------|-----------|-----------|-----------|
| N1-Ag1-N2 | 76.65     | N2-Ag1-N3 | 114.89    |
| N1-Ag1-N3 | 76.65     | N2-Ag1-N4 | 117.13    |
| N1-Ag1-N4 | 76.72     | N3-Ag1-N4 | 112.53    |

**Table S2.** CH...O and CH... $\pi$  interactions in [Ag(1)]ClO<sub>4</sub>

| C-H      | A                  | C-H [Å] | H...A [Å] | C...A [Å] | C-H...A [°] |
|----------|--------------------|---------|-----------|-----------|-------------|
| C25-H25A | O1 <sup>i</sup>    | 0.95    | 2.55      | 3.1927    | 125         |
| C11-H11B | Cg2 <sup>ii</sup>  | 0.99    | 2.83      | 3.8004    | 168         |
| C23-H23A | Cg1 <sup>iii</sup> | 0.95    | 2.93      | 3.7998    | 154         |

Symmetry codes: (i) = 1-x,1-y,1-z, (ii) = 2-x,-y,1-z, (iii) = 2-x,1-y,1-z,

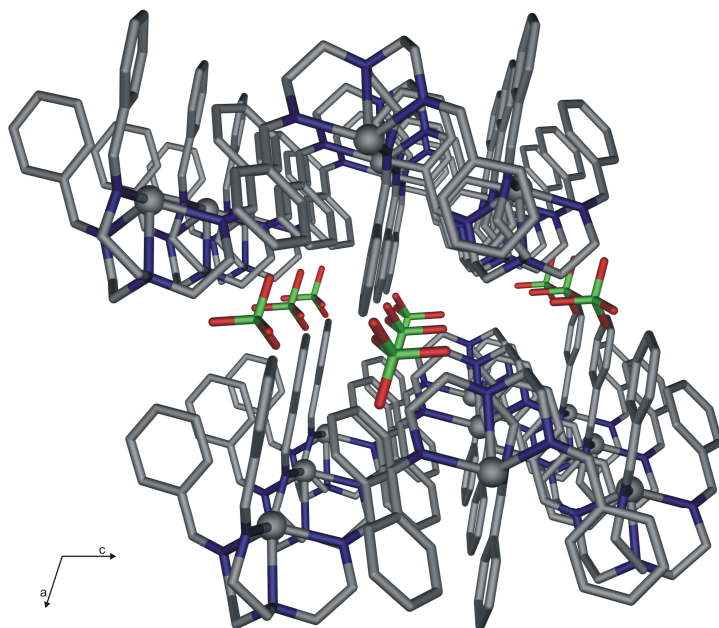

**Fig. S1** Crystal packing in [Ag(1)]ClO<sub>4</sub>, viewed along *b*-axis.

### [Ag(2)]ClO<sub>4</sub>

**Table S3.** Selected angles [°] of [Ag(2)]ClO<sub>4</sub>

| atom       | angle [°] | atom        | angle [°] |
|------------|-----------|-------------|-----------|
| N1-Ag1-N4  | 76.74     | N4-Ag1-N20  | 115.63    |
| N1-Ag1-N20 | 75.88     | N4-Ag1-N36  | 119.09    |
| N1-Ag1-N36 | 77.41     | N20-Ag1-N36 | 109.81    |

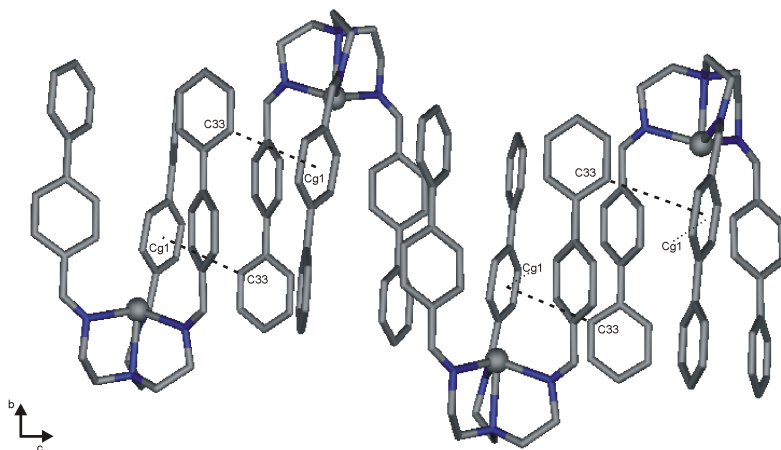

**Fig. S2.** CH... $\pi$ -interaction in [Ag(2)]ClO<sub>4</sub>, H atoms and ClO<sub>4</sub><sup>-</sup> counter ion removed for clarity, projection along the *a*-axis.

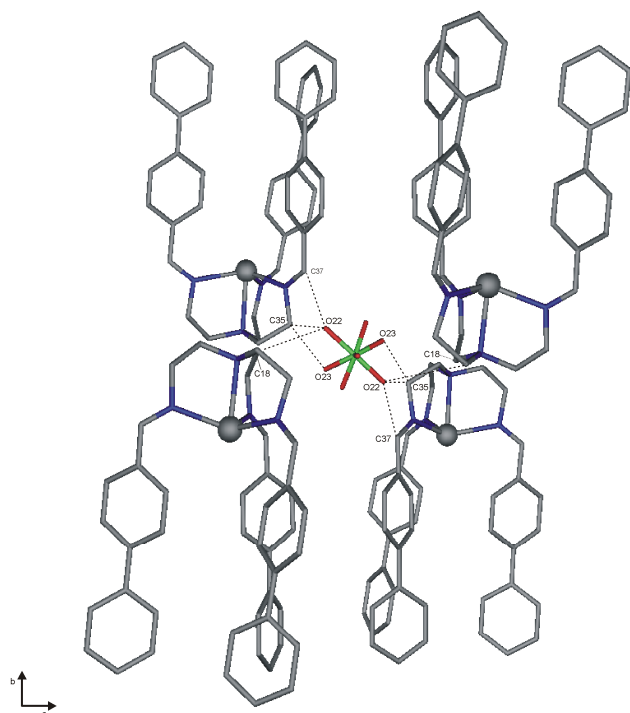

**Fig. S3.** CH...O-interaction in [Ag(2)]ClO<sub>4</sub>, H atoms removed for clarity, viewed along *c*-axis.

**Table S4.** H-bond interactions in [Ag(2)] ClO<sub>4</sub>

| D-H...A                         | D-H [Å] | H...A [Å] | D...A [Å] | D-H-A [°] |
|---------------------------------|---------|-----------|-----------|-----------|
| C18-H18A ... O22 <sup>i</sup>   | 0.99    | 2.51      | 3.133(7)  | 120       |
| C35-H35B ... O22 <sup>ii</sup>  | 0.99    | 2.42      | 3.339(7)  | 154       |
| C35-H35B ... O23 <sup>iii</sup> | 0.99    | 2.50      | 3.472(9)  | 169       |
| C37-H37 ... O22 <sup>ii</sup>   | 0.95    | 2.31      | 3.148(7)  | 146       |

symmetry: i = 3/2-x, 1/2-y, z; ii = 3/2-x, y, 1/2+z; iii = x, 1/2-y, 1/2+z

### [Ag<sub>3</sub>(3)<sub>2</sub>](ClO<sub>4</sub>)<sub>3</sub>·0.5H<sub>2</sub>O

**Table S5.** Selected bond lengths [Å] and angles [°] of [Ag<sub>3</sub>(3)<sub>2</sub>](ClO<sub>4</sub>)<sub>3</sub>·0.5H<sub>2</sub>O

| atom        | bond length [Å] | atom              | angle [°] | atom              | angle [°] |
|-------------|-----------------|-------------------|-----------|-------------------|-----------|
| Ag(1)-N(2)  | 2.270(6)        | N(2)-Ag(1)-N(3)   | 70.97     | N(3)-Ag(1)-N(5)   | 103.89    |
| Ag(1)-N(3)  | 2.481(6)        | N(2)-Ag(1)-N(4)   | 117.04    | N(4)-Ag(1)-N(5)   | 71.49     |
| Ag(1)-N(4)  | 2.307(7)        | N(2)-Ag(1)-N(5)   | 171.41    |                   |           |
| Ag(1)-N(5)  | 2.375(7)        | N(3)-Ag(1)-N(4)   | 136.20    |                   |           |
| Ag(2)-N(6)  | 2.355(6)        | N(6)-Ag(2)-N(7)   | 71.68     | N(7)-Ag(2)-N(10)  | 97.32     |
| Ag(2)-N(7)  | 2.366(6)        | N(6)-Ag(2)-N(9)   | 126.14    | N(9)-Ag(2)-N(10)  | 71.41     |
| Ag(2)-N(9)  | 2.276(6)        | N(6)-Ag(2)-N(10)  | 153.66    |                   |           |
| Ag(2)-N(10) | 2.469(6)        | N(7)-Ag(2)-N(9)   | 158.15    |                   |           |
| Ag(3)-N(11) | 2.324(6)        | N(11)-Ag(3)-N(12) | 72.18     | N(12)-Ag(3)-N(14) | 103.77    |
| Ag(3)-N(12) | 2.345(6)        | N(11)-Ag(3)-N(13) | 119.37    | N(13)-Ag(3)-N(14) | 71.57     |
| Ag(3)-N(13) | 2.286(6)        | N(11)-Ag(3)-N(14) | 142.42    |                   |           |
| Ag(3)-N(14) | 2.457(7)        | N(12)-Ag(3)-N(13) | 166.61    |                   |           |

The crystal packing of  $[\text{Ag}_3(\mathbf{3})_2](\text{ClO}_4)_3 \cdot 0.5\text{H}_2\text{O}$  is shown in Fig. S4 together with the H-bond pattern. The H-atoms of the coordinated water molecule was not observed. However, a separation of 3.02 Å between the water O-atom (OW1) and O-atom O1 of one  $\text{ClO}_4^-$  ion is indicative of the presence of a H-bond.

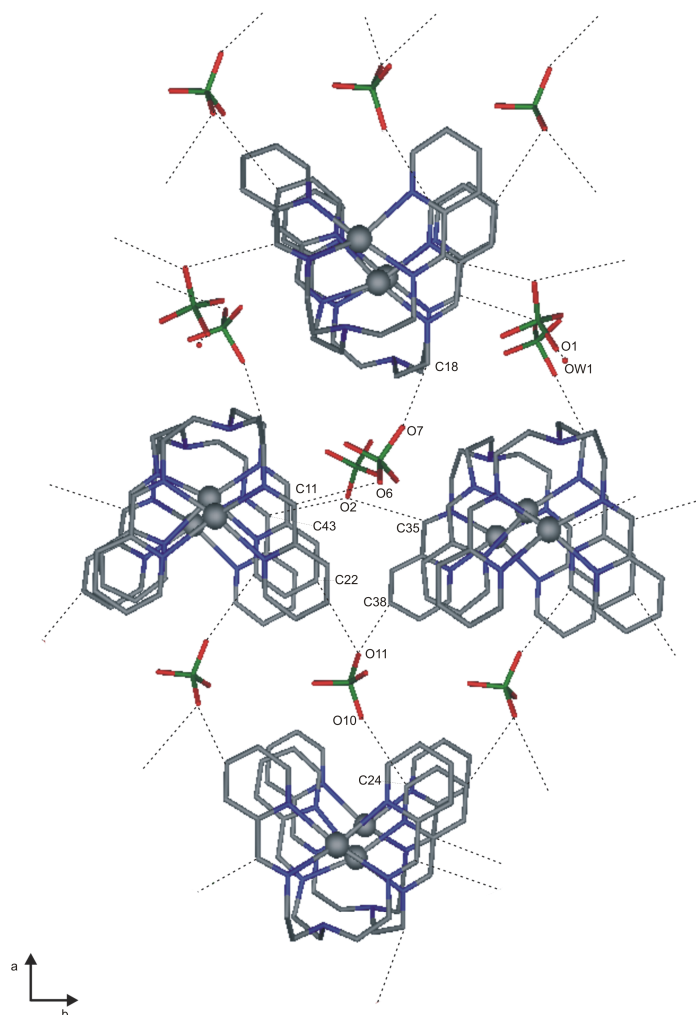

**Fig. S4.** H-bonding in  $[\text{Ag}_3(\mathbf{3})_2](\text{ClO}_4)_3 \cdot 0.5\text{H}_2\text{O}$  viewed along the  $c$ -axis. H atoms and the disorder of the  $\text{ClO}_4^-$  anion are omitted for clarity.

**Table S6.** Selected bond lengths and angles of  $\text{CH}\cdots\text{O}$  and O-water interaction in  $[\text{Ag}_3(\mathbf{3})_2](\text{ClO}_4)_3 \cdot 0.5\text{H}_2\text{O}$ .

| D-H $\cdots$ A                         | D-H [Å] | H $\cdots$ A [Å] | D $\cdots$ A [Å] | D-H-A [°] |
|----------------------------------------|---------|------------------|------------------|-----------|
| C11 – H11A $\cdots$ O6 <sup>i</sup>    | 0.95    | 2.41             | 3.259(15)        | 148       |
| C18 – H18A $\cdots$ O7 <sup>ii</sup>   | 0.99    | 2.41             | 3.264(13)        | 144       |
| C22 – H22A $\cdots$ O11 <sup>iii</sup> | 0.95    | 2.46             | 3.268(19)        | 142       |
| C24 – H24A $\cdots$ O10                | 0.95    | 2.38             | 3.211(11)        | 145       |
| C35 – H35A $\cdots$ O2 <sup>iv</sup>   | 0.95    | 2.51             | 3.357(11)        | 149       |
| C38 – H38A $\cdots$ O11 <sup>v</sup>   | 0.95    | 2.44             | 3.049(17)        | 122       |
| C43 – H43A $\cdots$ O2 <sup>vi</sup>   | 0.95    | 2.51             | 3.418(12)        | 160       |
| O1W $\cdots$ O1 <sup>v</sup>           |         |                  | 3.026(17)        |           |

symmetry: i =  $x, 1+y, z$ ; ii =  $3/2-x, 1/2+y, 1/2-z$ ; iii =  $1/2-x, 1/2+y, 1/2-z$ ; iv =  $1-x, -1+y, 1-z$ ; v =  $1/2-x, -1/2+y, 1/2-z$ ; vi =  $1-x, y, 1-z$

$\{[Ag_3(4)_2](ClO_4)_3\}_n$

**Table S7.** Selected angles [ $^\circ$ ] of  $\{[Ag_3(4)_2](ClO_4)_3\}_n$

| angle                | angle [ $^\circ$ ] | angle                 | angle [ $^\circ$ ] | angle                | angle [ $^\circ$ ] |
|----------------------|--------------------|-----------------------|--------------------|----------------------|--------------------|
| N(1) - Ag(1) - N(4)  | 75.99              | N(7) - Ag(2) - N(11)  | 72.61              | N(3) - Ag(3) - N(5)  | 121.00             |
| N(1) - Ag(1) - N(6)  | 74.22              | N(7) - Ag(2) - N(14)  | 147.60             | N(3) - Ag(3) - N(9)  | 98.89              |
| N(1) - Ag(1) - N(12) | 145.21             | N(8) - Ag(2) - N(10)  | 105.45             | N(3) - Ag(3) - N(13) | 115.57             |
| N(4) - Ag(1) - N(6)  | 111.85             | N(8) - Ag(2) - N(11)  | 106.88             | N(5) - Ag(3) - N(9)  | 107.80             |
| N(4) - Ag(1) - N(12) | 129.35             | N(8) - Ag(2) - N(14)  | 136.72             | N(5) - Ag(3) - N(13) | 108.62             |
| N(6) - Ag(1) - N(12) | 108.69             | N(10) - Ag(2) - N(11) | 120.55             | N(9) - Ag(3) - N(13) | 102.45             |
| N(7) - Ag(2) - N(8)  | 73.92              | N(10) - Ag(2) - N(14) | 78.78              |                      |                    |
| N(7) - Ag(2) - N(10) | 70.39              | N(11) - Ag(2) - N(14) | 100.60             |                      |                    |

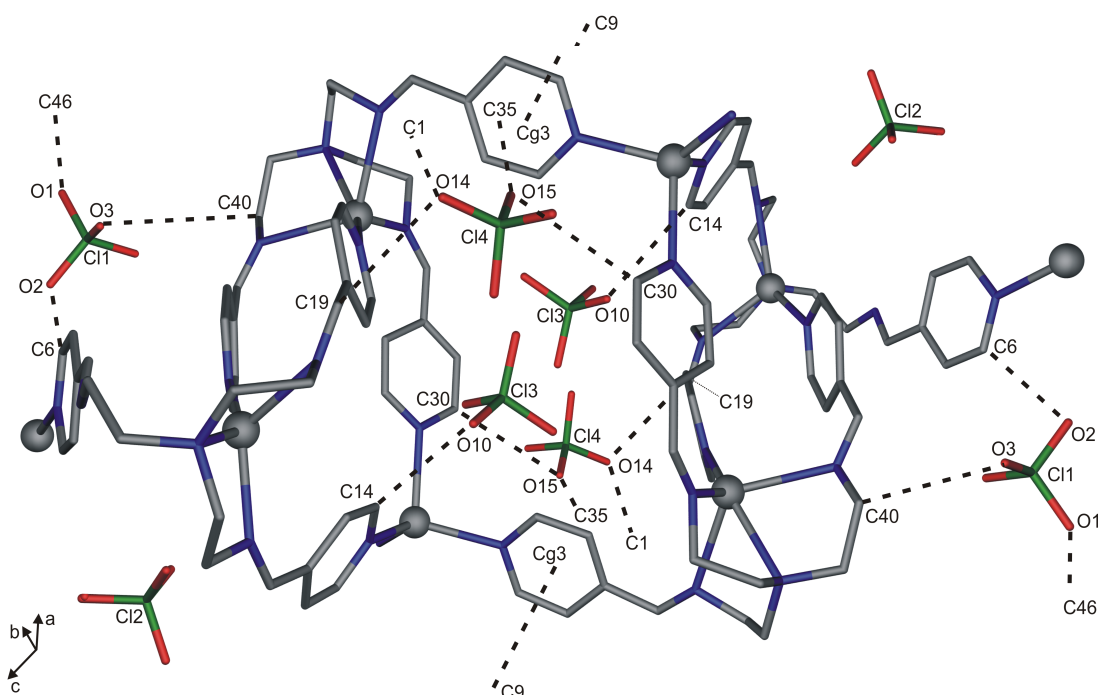

**Fig. S5** Weak CH-O and  $\pi$ - $\pi$  interactions in  $\{[Ag_3(4)_2]ClO_4\}_n$  as dashed lines, H atoms removed for clarity.

**Table S8.** Distance and angles of the CH-O interactions in  $\{[Ag_3(4)_2]ClO_4\}_n$

| D-H      | A                  | D-H [ $\text{\AA}$ ] | DH $\cdots$ A [ $\text{\AA}$ ] | D $\cdots$ A [ $\text{\AA}$ ] | D-H-A [ $^\circ$ ] |
|----------|--------------------|----------------------|--------------------------------|-------------------------------|--------------------|
| C1-H1A   | O14 <sup>i</sup>   | 0.99                 | 2.34                           | 3.108(8)                      | 134                |
| C6-H6A   | O2                 | 0.95                 | 2.48                           | 3.382(6)                      | 158                |
| C14-H14A | O10                | 0.95                 | 2.23                           | 3.174(9)                      | 171                |
| C19-H19A | O14                | 0.95                 | 2.50                           | 3.160(8)                      | 126                |
| C30-H30A | O15 <sup>ii</sup>  | 0.95                 | 2.49                           | 3.389(13)                     | 157                |
| C35-H35A | O15 <sup>iii</sup> | 0.95                 | 2.48                           | 3.391(12)                     | 160                |
| C40-H40A | O3                 | 0.99                 | 2.45                           | 3.397(7)                      | 159                |
| C46-H46A | O1 <sup>iv</sup>   | 0.95                 | 2.52                           | 3.470(5)                      | 176                |

Symmetry transformation: (i) = 1-x,-y,2-z; (ii) = -x,-y,1-z; (iii) = 1-x,-y,1-z; (iv) = 1-x,1-y,2-z.
